# Supplementary material for: Injectable amine functionalized graphene and chondroitin sulfate hydrogel with potential for cartilage regeneration
Source: Royal Society of Chemistry journal article supplement (doi:10.1039/c8tb02967a), 2019-01-01
Supplement: c8tb02967a1.pdf [file c8tb02967a1.pdf]

## Electronic Supplementary Information

### **Injectable Amine Functionalized Graphene and Chondroitin Sulfate Hydrogel with Potential for Cartilage Regeneration**

*Caixin Tang,<sup>‡<sup>a</sup></sup> Brian D. Holt,<sup>‡<sup>a</sup></sup> Zoe M. Wright,<sup>a</sup> Anne M. Arnold,<sup>a</sup> Alexandra C. Moy<sup>b</sup> and Stefanie A. Sydlik<sup>\*<sup>a</sup>c</sup>*

---

<sup>a</sup> Department of Chemistry, Carnegie Mellon University, 4400 Fifth Avenue, Pittsburgh, Pennsylvania 15213, USA. E-mail: ssydlik@andrew.cmu.edu

<sup>b</sup> Department of Materials Science and Engineering, Carnegie Mellon University, 5000 Forbes Avenue, Pittsburgh, Pennsylvania 15213, USA

<sup>c</sup> Department of Biomedical Engineering, Carnegie Mellon University, 5000 Forbes Avenue, Pittsburgh, Pennsylvania 15213, USA

<sup>‡</sup> Co-first authors.

## Supplementary experimental section

| <i>Name</i>                                    | <i>Description</i>                                                      | <i>Catalog Number</i> | <i>CAS Number</i>                                                           | <i>Lot Number</i> | <i>Supplier</i>   | <i>Production Location</i> |
|------------------------------------------------|-------------------------------------------------------------------------|-----------------------|-----------------------------------------------------------------------------|-------------------|-------------------|----------------------------|
| <i>p</i> -Toluenesulfonic acid monohydrate     | ReagentPlus®, 98.5%                                                     | T35920-100G           | 6192-52-5                                                                   | MKBH8370V         | Sigma Aldrich     | Japan                      |
| Concentrated sulfuric acid                     | Certified ACS Plus                                                      | A300-212 (2.5 L)      | 7664-93-9                                                                   | 174051            | Fisher Chemical   | United States of America   |
| Graphite                                       | Flake, natural, 325 mesh, 99.8% (metal basis)                           | 43209 (250G)          | 7782-42-5                                                                   | F01X009           | Alfa Aesar        | United States of America   |
| Potassium permanganate                         | ACS, 99.0% min                                                          | 14307 (500G)          | 7722-64-7                                                                   | T18D006           | Alfa Aesar        | United States of America   |
| Hydrogen peroxide                              | Certified ACS, 30%                                                      | H325-500ML            | For H <sub>2</sub> O <sub>2</sub> 7722-84-1, For H <sub>2</sub> O 7732-18-5 | 131932            | Fisher Scientific | Saudi Arabia               |
| SnakeSkin® dialysis tubing                     | 3.5K MWCO, 35 mm dry I.D., 35 feet                                      | Q9214926              | N/A                                                                         | N/A               | Thermo Scientific | N/A                        |
| Triethyl orthoacetate                          | 98%                                                                     | L06004 (2500ML)       | 78-39-7                                                                     | 5001A13M          | Alfa Aesar        | China                      |
| Sodium hydroxide                               | Certified ACS                                                           | S318-500G             | 1310-73-2                                                                   | 164106            | Fisher Chemical   | United States of America   |
| Ethyl alcohol                                  | 200 proof, absolute, anhydrous, ACS/USP grade                           | 111000200 (1Gallon)   | 64-17-5                                                                     | K17C31234         | Pharmco-AAPER     | N/A                        |
| <i>p</i> -Dioxane                              | For HPLC, Spectrophotometry, and GC                                     | DX2091-1              | 123-91-1                                                                    | 55222             | OmniSolv®         | China                      |
| Molecular sieves                               | Davidson®, Type 4A, Grade 514, 8-12 mesh, beads, effective pore size 4Å | M514-500 (500GM)      | N/A                                                                         | 052746            | Fisher Chemical   | N/A                        |
| <i>N,N</i> -Dimethylformamide                  | Spectranalyzed®                                                         | D131-1L               | 68-12-2                                                                     | 162304            | Fisher Chemical   | Saudi Arabia               |
| Thionyl chloride                               | ReagentPlus® ≥99%,                                                      | 230464-100ML          | 7719-09-7                                                                   | SHBD9658V         | Sigma Aldrich     | Germany                    |
| Chondroitin sulfate A                          | Sodium salt from bovine trachea, lyophilized powder                     | #C9819-25g            | 39455-18-0                                                                  | SLBJ4544V         | Sigma Aldrich     | China                      |
| Phosphate-buffered saline                      | PBS, 10×, PH7.4                                                         | J62036 1L             | N/A                                                                         | P18B901           | Alfa Aesar        | United States of America   |
| 1-Ethyl-3-(3-dimethylaminopropyl)-carbodiimide | N/A                                                                     | 024810 (100G)         | 25952-53-8                                                                  | 024810J25L        | Oakwood Chemical  | China                      |
| <i>N</i> -Hydroxysuccinimide                   | 98+%                                                                    | A10312 (25G)          | 6066-82-6                                                                   | 10195147          | Alfa Aesar        | Great Britain              |
| Chondroitinase ABC                             | Lyophilized powder from <i>Proteus vulgaris</i>                         | C2905                 | 9024-13-9                                                                   | 126M4082V         | Sigma Aldrich     | Israel                     |
| Picric acid                                    | Saturated solution, 1.3%                                                | P6744-1GA             | 89-89-1                                                                     | SHBB2249          | Sigma Aldrich     | United States of America   |

**Graphene oxide (GO) synthesis.** In a 4 L flask on ice behind a blast shield, graphite flakes (5 g) were added to concentrated sulfuric acid (125 mL) under stirring. Over 30 min, potassium permanganate (10 g) was slowly added. The mixture stirred for 1 h, was slowly warmed to room temperature, and then continued stirring for 1 h. The mixture was slowly heated to 35 °C and stirred for 90 min. After turning the heat off, deionized (DI) water (225 mL) was added slowly, followed by ice-cold DI water (700 mL) that was slowly added over 30 min. Hydrogen peroxide (10 mL) was added over 5 min, followed by additional ice-cold DI water (200 mL). The quenched reaction stirred at room temperature overnight.

The product was collected via centrifugation (3290×g / 4200 rpm, 10 min). The supernatant was discarded, and pellets were collected into 3500 Da molecular weight cutoff dialysis tubing and dialyzed in DI water for a week, changing the DI water daily. The remaining solids were collected, placed in a -80 °C freezer overnight, and lyophilized for three days, yielding a dry powder of GO.

**Claisen graphene synthesis.** A 1 L round bottom flask outfitted with a condenser column and stir bar was flame dried, placed under nitrogen, and charged with GO (1.98 g) and triethyl orthoacetate (402 mL). The reaction was sonicated (240 W, 42 kHz ultrasonic cleaner, Kendal) for 10 min to suspend the GO, charged with *p*-toluenesulfonic acid (34 g), and stirred and refluxed at 140 °C for 2 days under nitrogen, yielding Claisen graphene 1 (CG1).

Still under stirring, the reaction was cooled to room temperature. Sodium hydroxide (3.2 g) that was dissolved in ethanol (110 mL) was added slowly, and the reaction proceeded for 3 h under atmosphere. Then, the reaction was centrifuged (3290×g / 4200 rpm, 10 min) to collect the product. The supernatant was discarded, and the pellet was washed three times with acetone and two times with DI water. The final product was dried under vacuum, yielding Claisen graphene 2 (CG2).

**Acid Chloride Graphene Synthesis.** A flame-dried, 1 L round bottom flask was charged with dioxane (240 mL) that was dried with 4 Å molecular sieves, Claisen graphene 2 (2 g), and anhydrous dimethylformamide (2 mL) under nitrogen. The reaction mixture was sonicated for 10 min to disperse the Claisen graphene 2. Next, thionyl chloride (9.6 mL) was added slowly, and the mixture was allowed to react overnight at room temperature under nitrogen. The reaction mixture was centrifuged ( $3290\times g$  / 4200 rpm, 10 min), the supernatant discarded, and the pellet was dried, yielding acid chloride graphene. To prevent degradation of acid chloride graphene, it was immediately used for the synthesis of ethylenediamine graphene (EDAG).

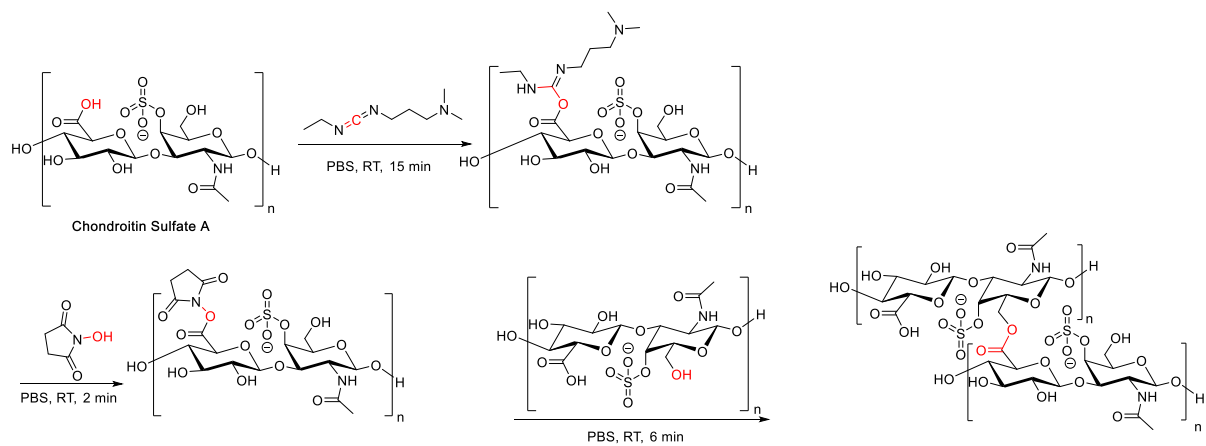

**Scheme S1** Synthesis of CS–CS gels. EDC/NHS activate the carboxylic acid groups of the CS backbone. Then, the less sterically hindered hydroxyl group of CS acts as a nucleophile, forming covalently crosslinked, CS–CS gels.

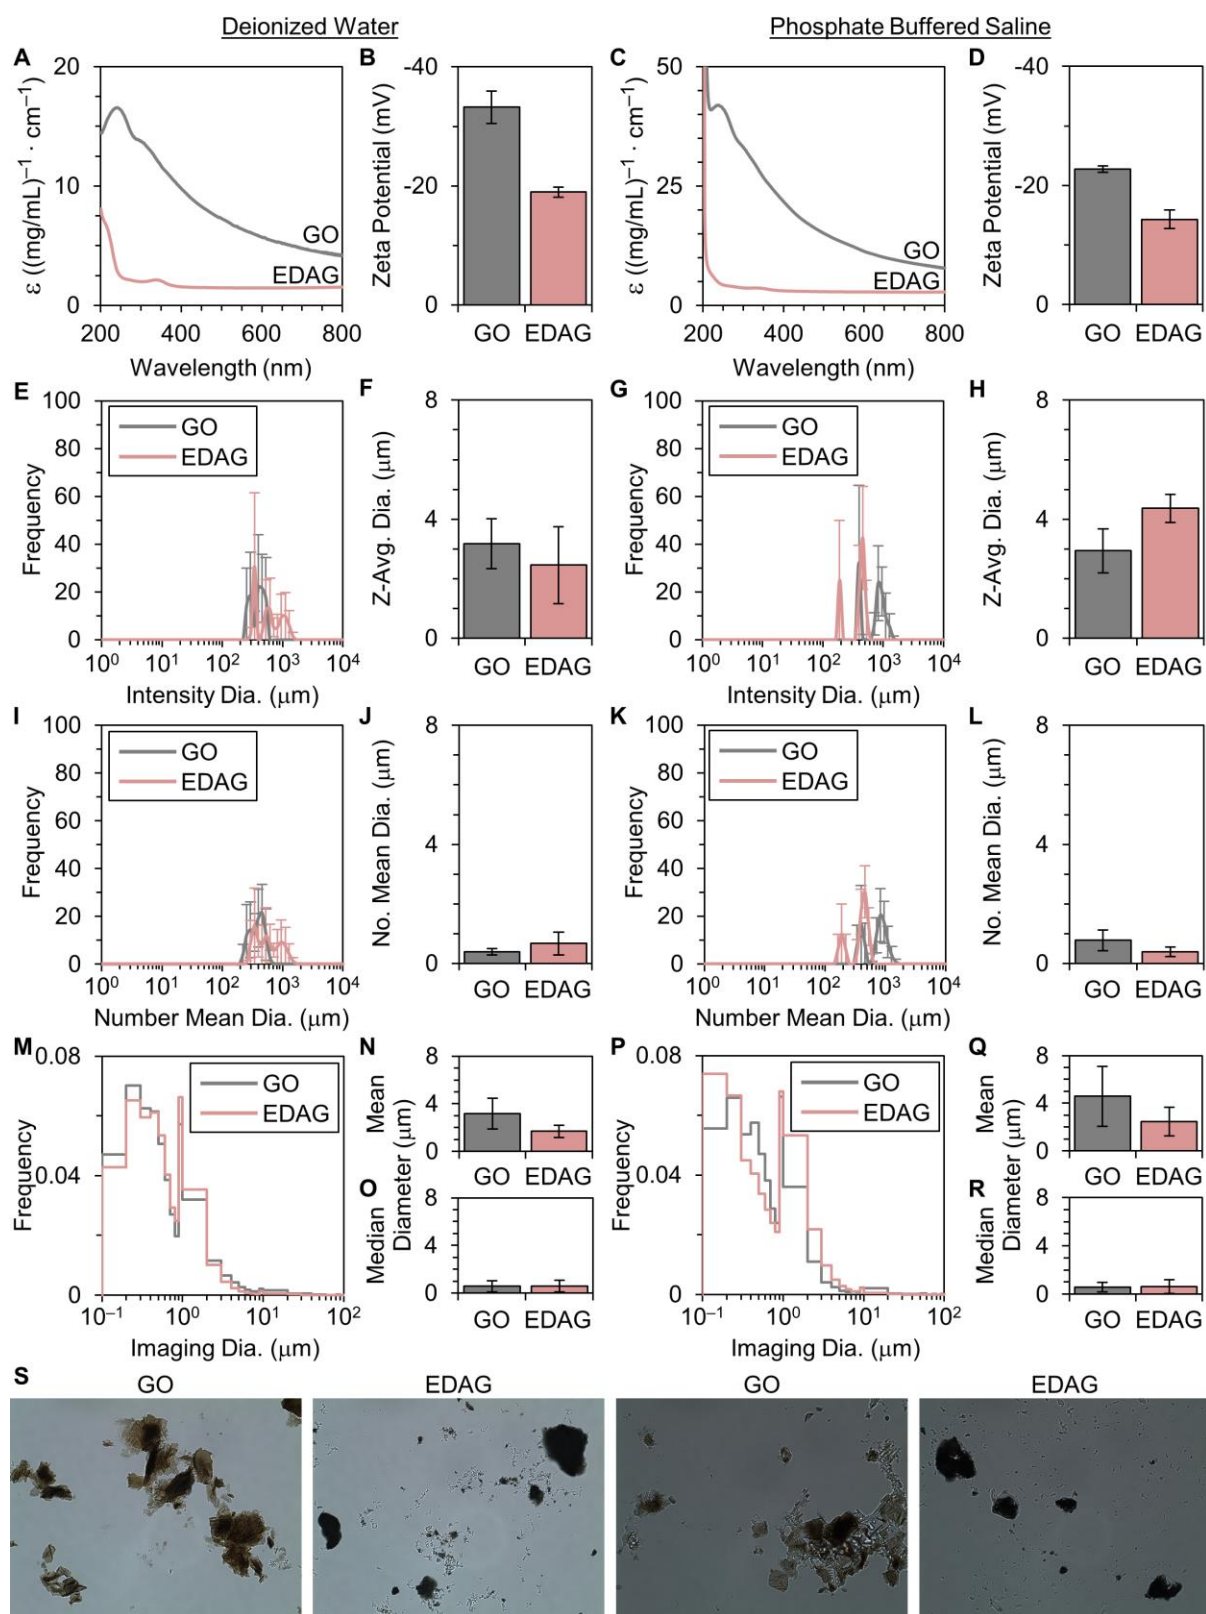

**Fig. S1** Particle characterization of dispersions of GO and EDAG in DI water and PBS. (A,C) Absorbance spectroscopy and (B,D) average zeta potential. (E–F) Dynamic light scattering-determined data. (E,G) Intensity-based distributions of particle size. (F,H) Z-average (cumulants) mean diameters. (I,K) Number-based distributions of particle size. (J,L) Number-based mean diameters. (M–S) Optical imaging-determined data. (M,P) Distributions of particle sizes and (N,Q) mean and (O,R) median diameters determined from optical imaging. (S) Representative color images of GO and EDAG particles.

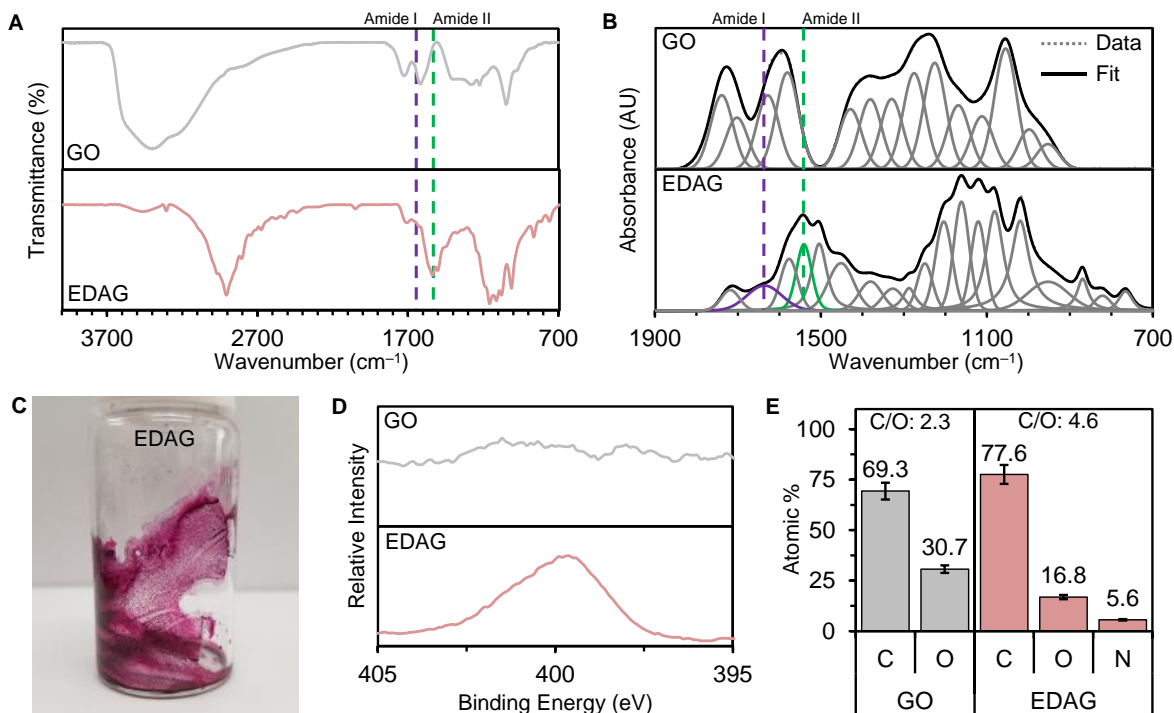

**Fig. S2** Compositional characterization of EDAG compared to GO. (A) FTIR spectra. (B) Peak fitting of the FTIR spectra over 700–1900 cm<sup>-1</sup>. The peaks at 1637 and 1541 cm<sup>-1</sup> that correspond to Amide I and Amide II are colored purple and green, respectively, and confirm amide functionalization for EDAG. (C) Optical image of EDAG subjected to the ninhydrin amine test. (D) XPS high resolution nitrogen (N1s) spectra. (E) Elemental composition as determined from XPS. No nitrogen was detected for GO.

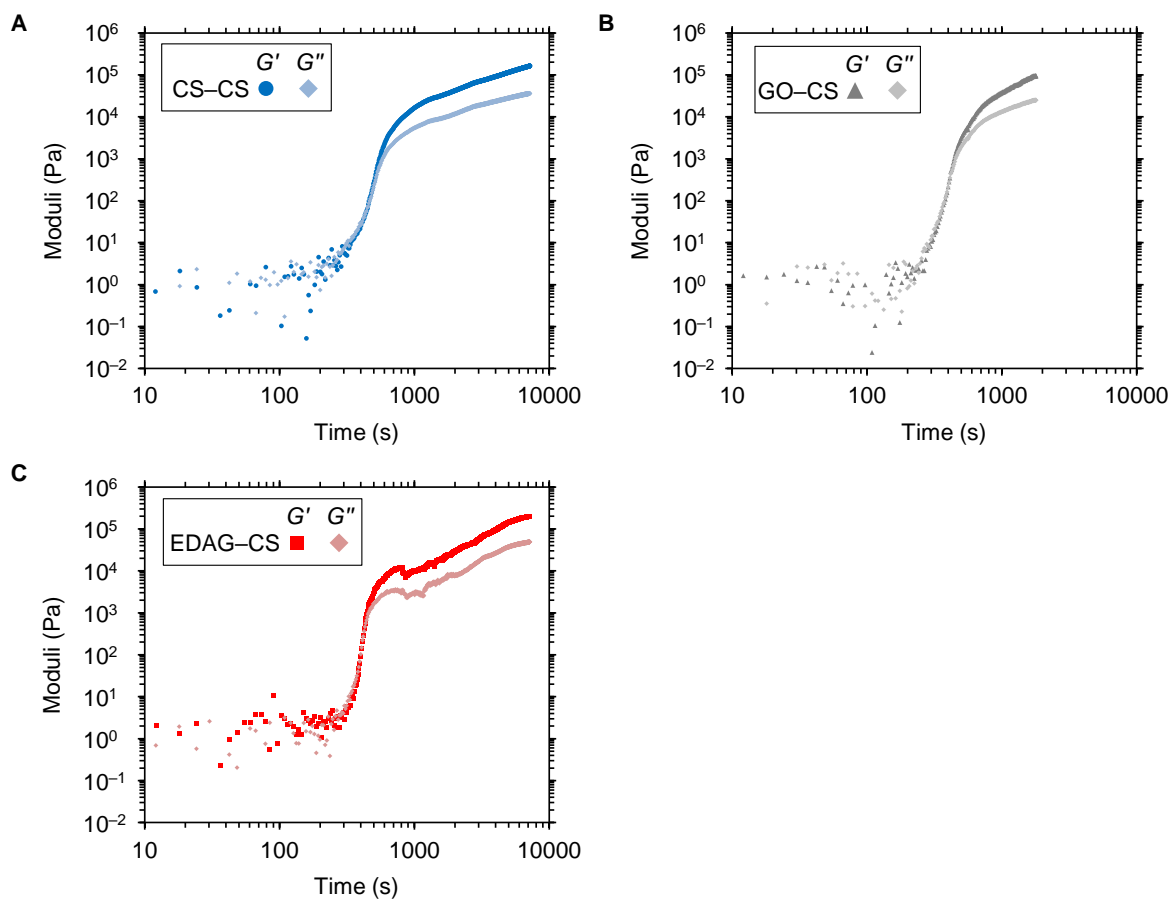

**Fig. S3** Representative shear storage ( $G'$ ) and loss ( $G''$ ) moduli for reactions of (A) chondroitin sulfate (CS) only, (B) graphene oxide (GO) and CS, and (C) ethylenediamine graphene (EDAG) and CS that were prepared and immediately place on the rheometer for analysis. Gelation time is defined as when  $G'$  increases above (i.e., crosses over)  $G''$ .



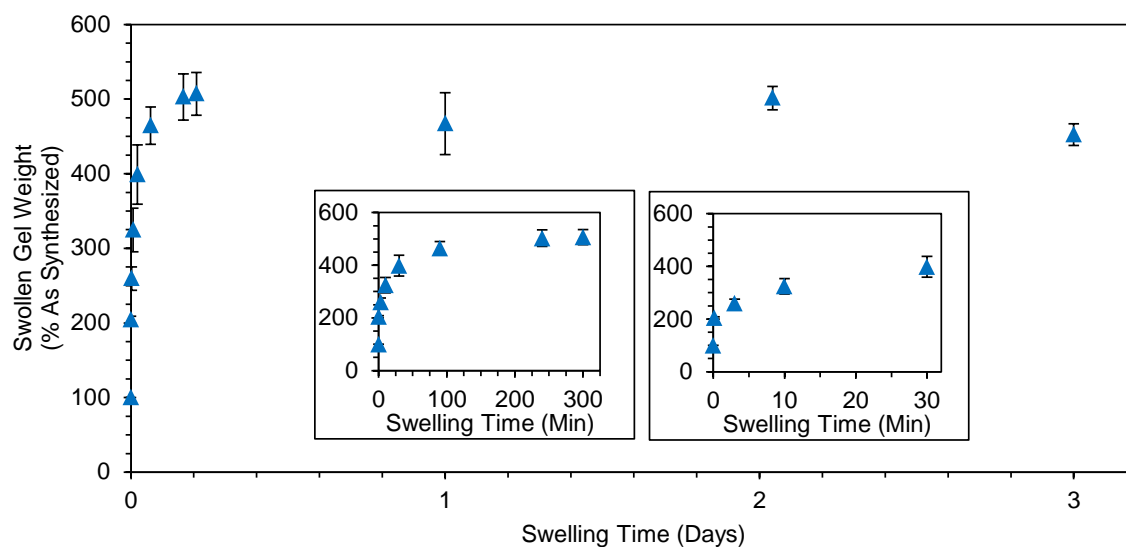

**Fig. S4** Time-dependent swelling of CS–CS gels prepared in molds for 90 min then placed into pre-weighed scintillation vials. The  $t = 0$  time point is for the as-produced gel that was not exposed to a semi-infinite bath of DI water. Subsequent time points indicate the time for which the gels were exposed to a semi-infinite bath of DI water (10 s to 3 days). Two inset plots are included for clarity. Equilibrium is reached after 4 h.

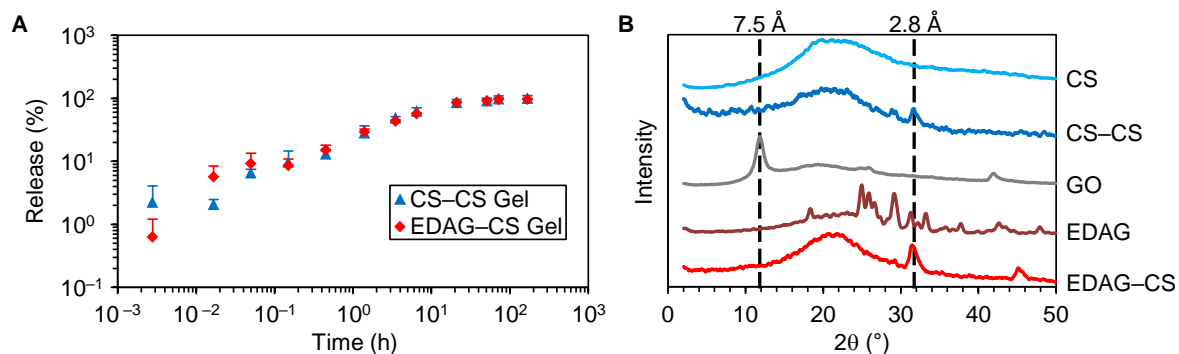

**Fig. S5** Structural characterization. (A) Chondroitin sulfate (CS) only (CS–CS) and ethylenediamine graphene (EDAG)–CS gels that were reacted in solution containing a small molecule chromophore and then placed in a semi-infinite bath of deionized water nearly completely released the small molecule chromophore over time, suggesting an interconnected porous structure. Error bars are sample standard deviation. (B) Powder X-ray diffraction indicates lack of crystallinity for gels that were synthesized and lyophilized to dryness for analysis. The line at  $11.8^\circ$  corresponds to  $d_{hkl} = 7.5 \text{ \AA}$  of GO. The line at  $31.73^\circ$  ( $2.8 \text{ \AA}$ ) is centered at the small peak observed for the gels but not for the starting materials.

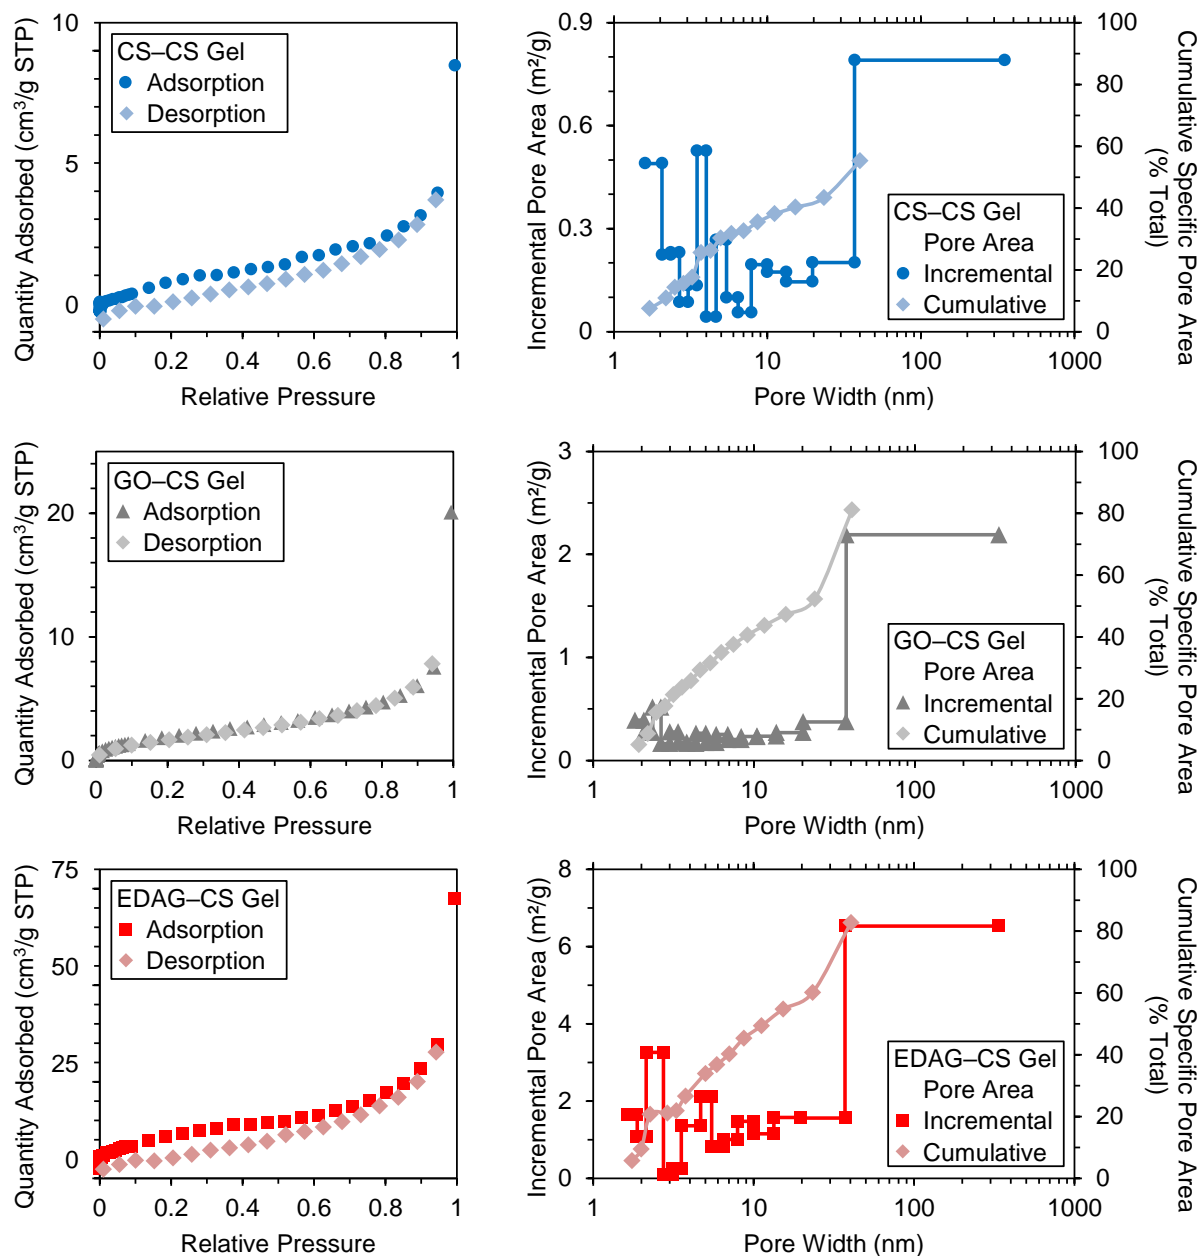

**Fig. S6** Porosimetry adsorption/desorption isotherms and pore size distributions.

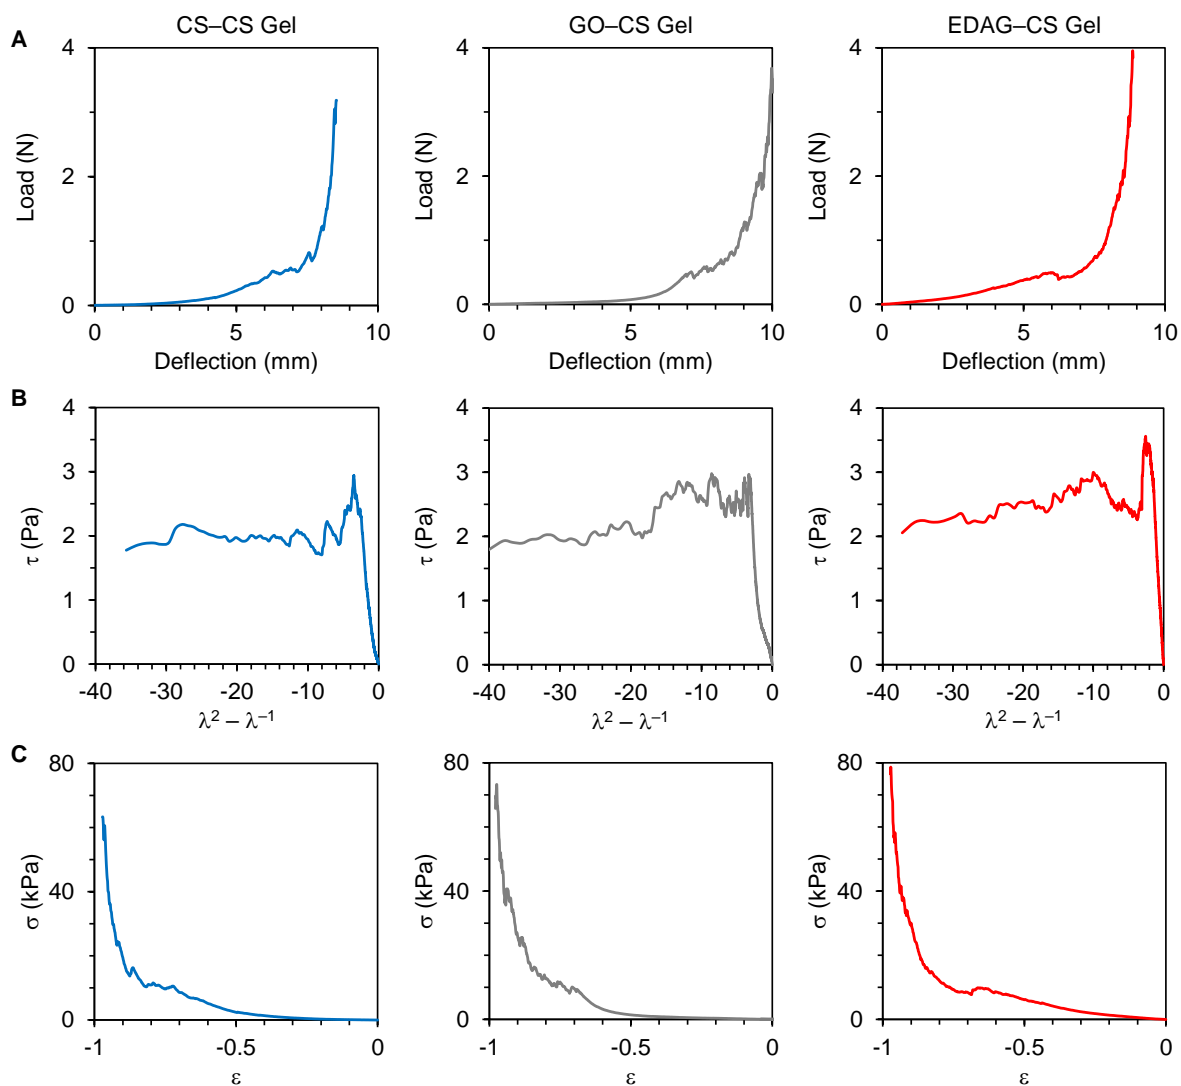

**Fig. S7** Representative axial compression data. (A) As-acquired load (force) deflection (distance) data. (B) True stress ( $\tau$ ) versus adjusted stretch ( $\lambda$ ). (C) Engineering stress ( $\sigma$ ) versus engineering strain ( $\epsilon$ ). For comparison, the three plots for each type of gel are from the same sample.

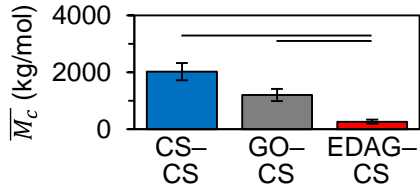

**Fig. S8** Average molecular weight between crosslinks ( $\overline{M}_c$ ) as determined from axial compression measurements and rubber elasticity theory.  $n = 9, 10,$  and  $7$  for CS–CS, GO–CS, and EDAG–CS gels, respectively. ANOVA F-value  $12.8$  and  $p$ -value  $1.8 \times 10^{-4}$ . Sidak post hoc test two-tailed  $p$ -value for CS–CS to EDAG–CS gels is  $1.2 \times 10^{-4}$  and for GO–CS to EDAG–CS gels is  $0.033$ . Error bars are SEM and lines indicate a  $p$ -value  $< 0.05$ .

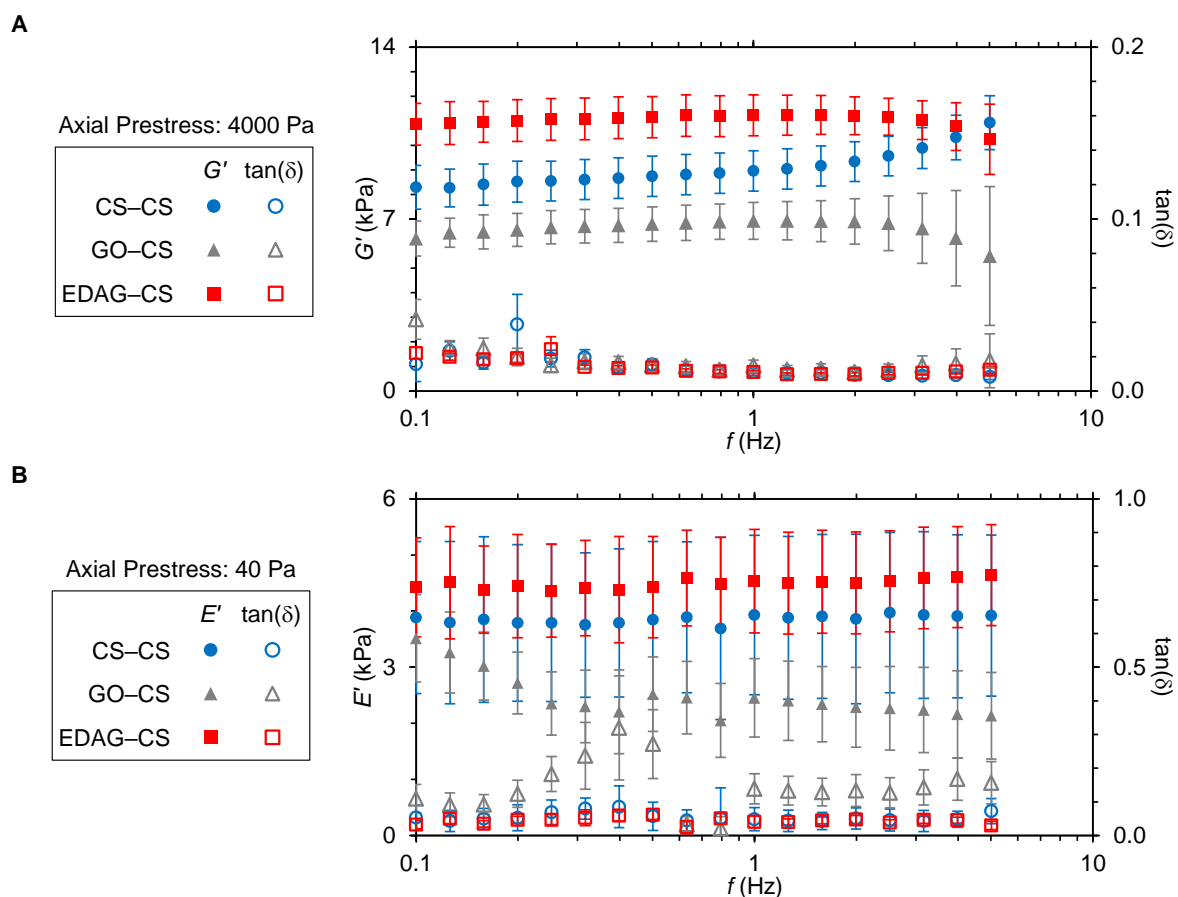

**Fig. S9** Assessment of the mechanical properties of gels using dynamic techniques. (A) Shear storage modulus ( $G'$ ) and  $\tan\delta$  measured with an axial prestress of 4000 Pa. The total shear response of EDAG-CS is stiffer than that of CS-CS.  $n = 15, 3,$  and  $9$  for CS-CS, GO-CS, and EDAG-CS gels, respectively. ANOVA F-value 371.4 and  $p$ -value  $4.0 \times 10^{-31}$ . Error bars are SEM. (B) Axial compressive dynamic mechanical analysis storage ( $E'$ ) and loss ( $E''$ ) moduli measured with an axial prestress of 40 Pa show that EDAG-CS gels are stiffer than CS-CS gels.  $n = 3$ . ANOVA F-value 329.8 and  $p$ -value  $6.7 \times 10^{-30}$ . Error bars are SEM.

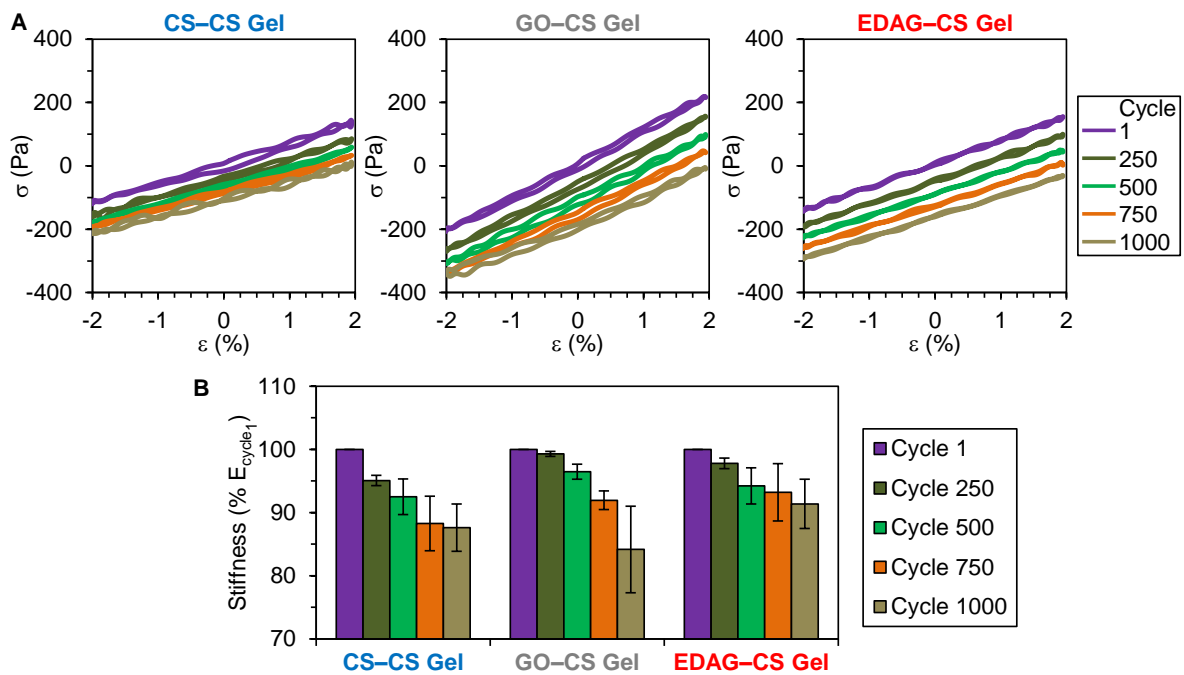

**Fig. S10** Fatigue testing. (A) Stress/strain curves for the indicated cycle number. (B) Gel stiffness with increasing cycle number as a percent of the initial stiffness. Note that the preforce on the GO-CS gel was 42% larger than the CS-CS and EDAG-CS gels and, thus, resulted in a stiffer response.

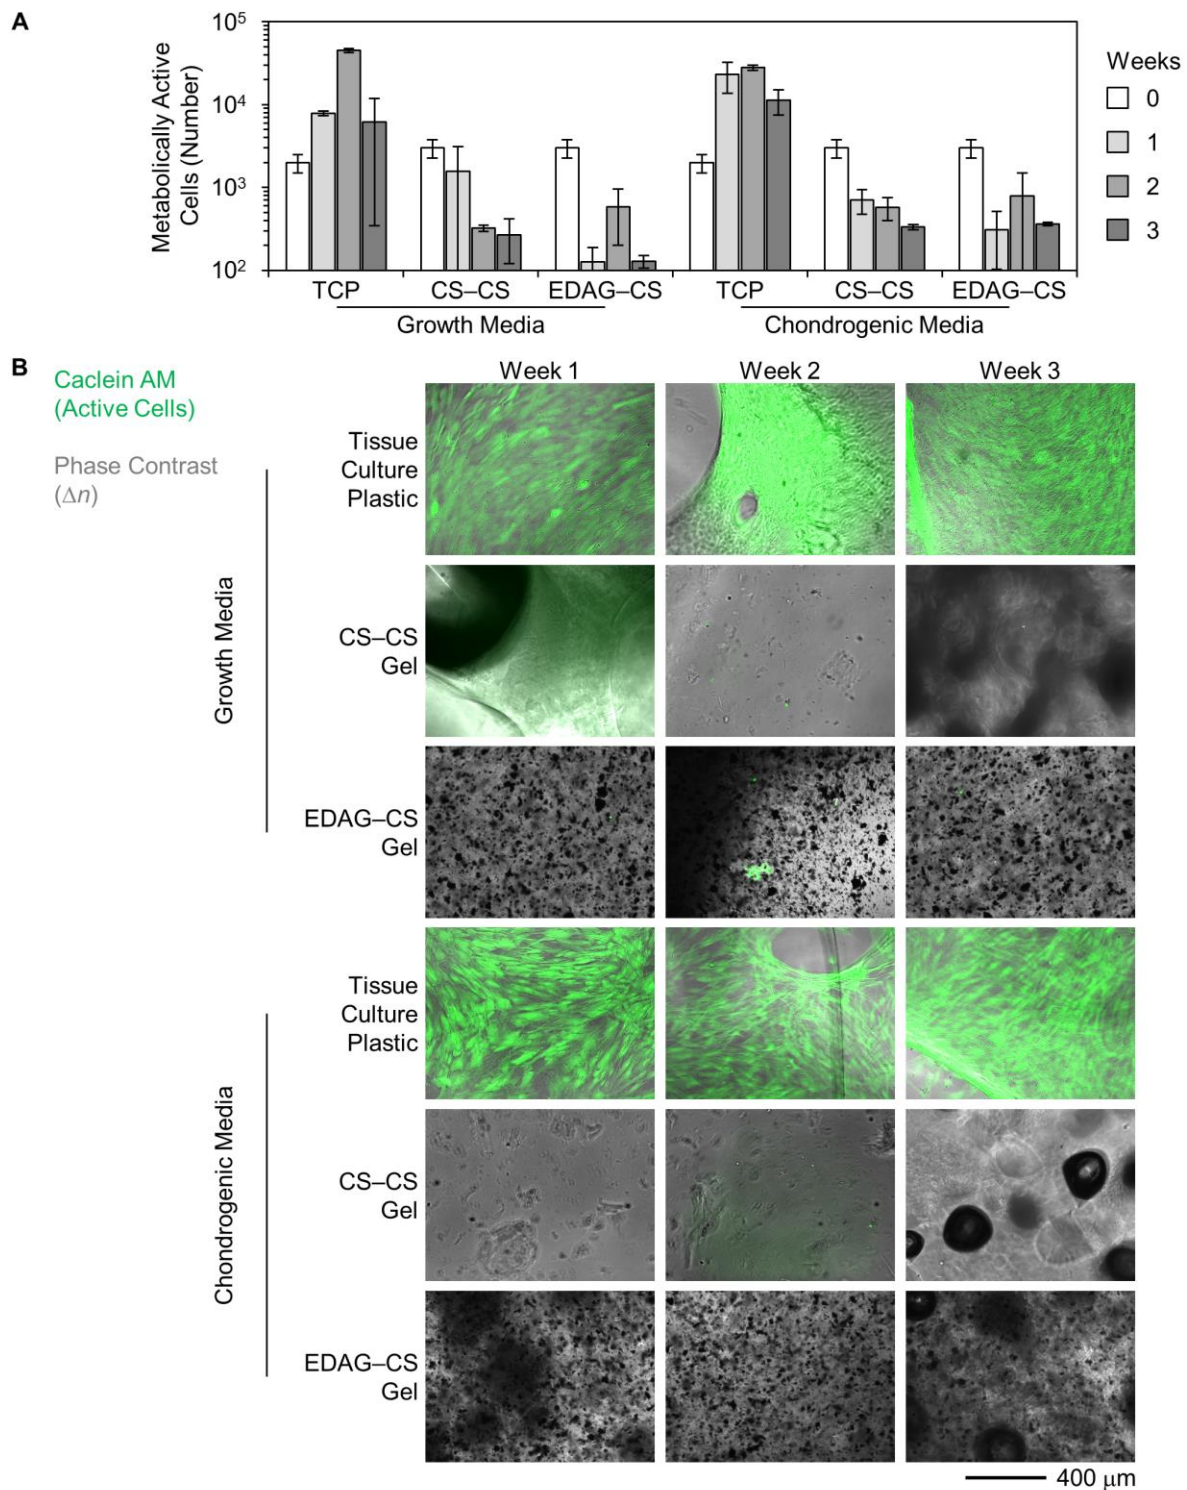

**Fig. S11** Cellular vitality analysis of human mesenchymal stem cells (hMSCs) encapsulated within gels. (A) Number of viable cells over time for different experimental conditions assessed using Calcein AM that fluoresces green when internalized into cells and converted into a fluorescent form by intracellular esterases. (B) Representative images of Calcein AM fluorescence overlaid on bright field images of hMSCs.



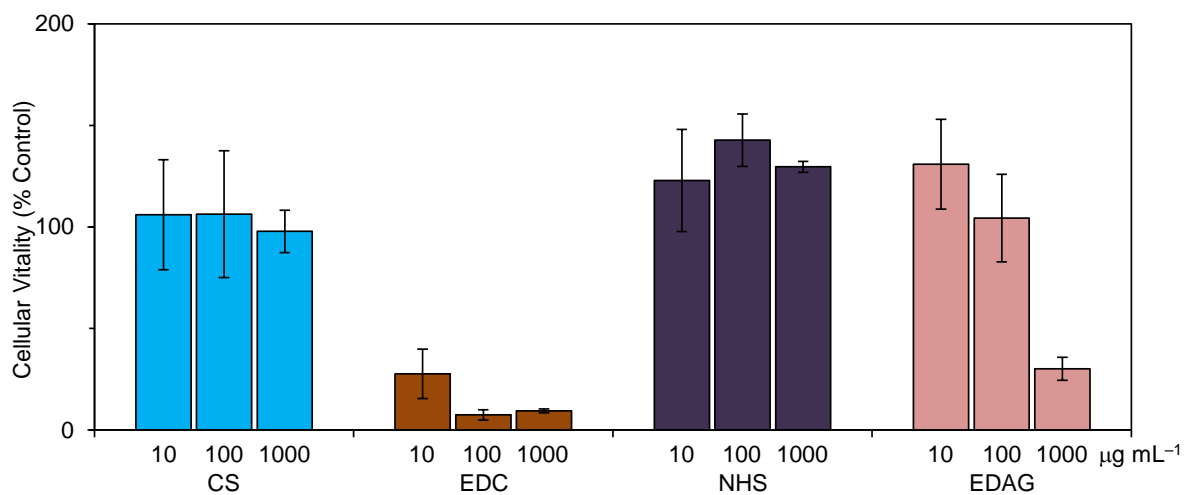

**Fig. S12** Cytocompatibility of starting materials assessed using Calcein AM that fluoresces green upon internalization into cells and conversion into a fluorescent form by intracellular esterases.  $n = 3$ , and error bars are sample standard deviation.

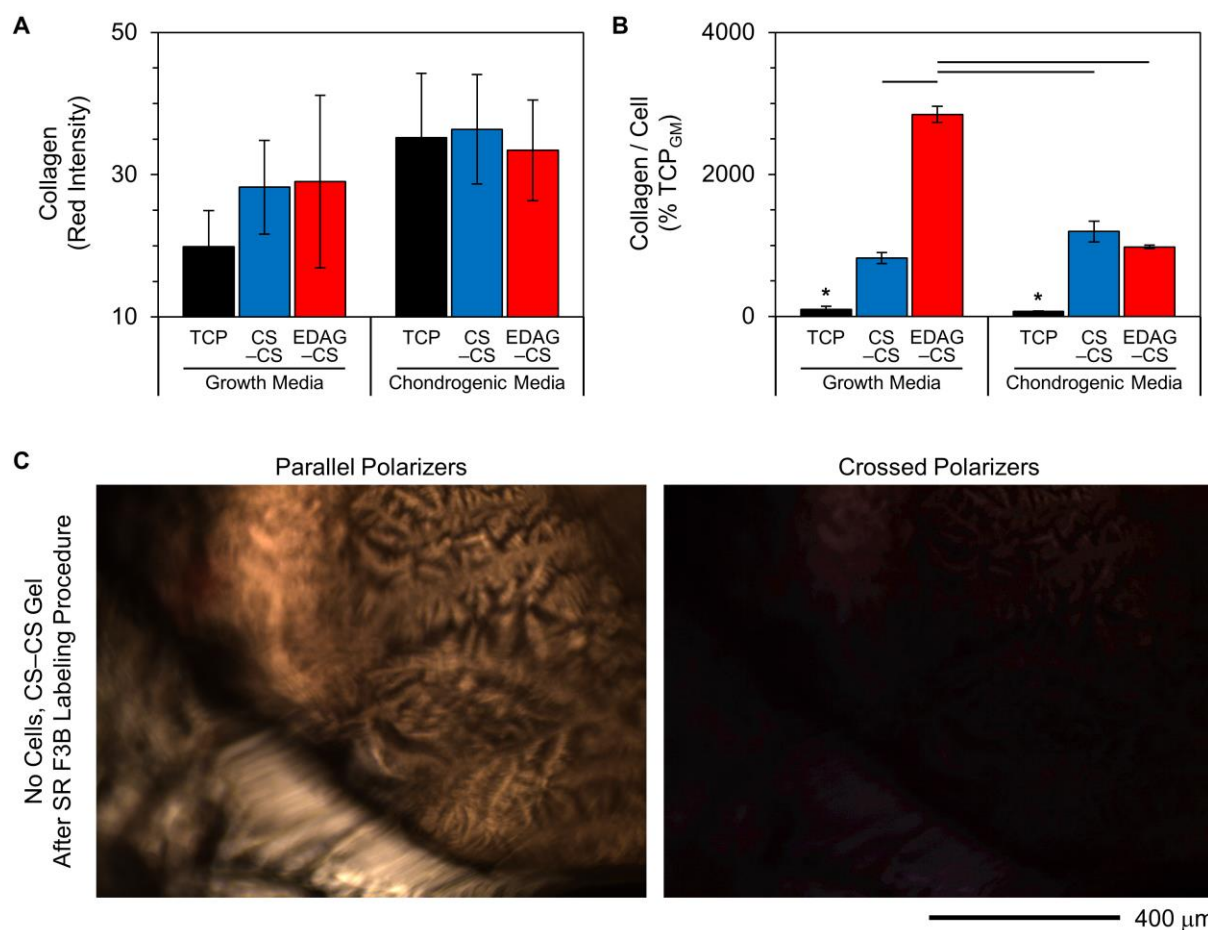

**Fig. S13** Quantification of total collagen from Sirius red F3B labeling. (A) Quantification of the intensity of sirius red F3B that labels collagen red from hMSCs. Average values from CS-CS gels without cells that were subjected to the same labeling procedure were small and subtracted from the reported average values for the cell-containing samples. Note that “TCP” refers to monolayer cell culture on tissue culture plastic.  $n = 4$ , ANOVA F-value 0.55 and  $p$ -value 0.74, and error bars are Sidak post hoc test two-tailed  $p$ -value for TCP growth media to TCP chondrogenic media is 0.045, and error bars are SEM. (B) Collagen intensity was divided by cell number and reported as a percent of the value of the TCP sample maintained in growth media.  $n = 4$ , ANOVA F-value 146.2 and  $p$ -value  $6.4 \times 10^{-14}$ , and error bars are SEM. Sidak post hoc test two-tailed  $p$ -values for TCP growth media to CS-CS growth media, EDAG-CS growth media, CS-CS chondrogenic media, and EDAG-CS chondrogenic media are  $1.4 \times 10^{-4}$ ,  $1.2 \times 10^{-13}$ ,  $4.6 \times 10^{-7}$ , and  $1.1 \times 10^{-5}$ , respectively; for TCP chondrogenic media to CS-CS growth media, EDAG-CS growth media, CS-CS chondrogenic media, and EDAG-CS chondrogenic media are  $8.1 \times 10^{-5}$ ,  $9.7 \times 10^{-14}$ ,  $3.0 \times 10^{-7}$ , and  $6.7 \times 10^{-6}$ , respectively; and for EDAG-CS growth media to CS-CS growth media, CS-CS chondrogenic media, and EDAG-CS chondrogenic media are  $2.3 \times 10^{-11}$ ,  $6.9 \times 10^{-10}$ , and  $8.8 \times 10^{-11}$ , respectively. Note that lines indicates a  $p$ -value  $< 0.05$  and \* indicates  $p$ -values  $< 0.05$  compared to all gel samples. (C) Representative color images of chondroitin sulfate only (CS-CS) gels that had no cells or media and were subjected to the collagen labeling procedure with sirius red F3B.

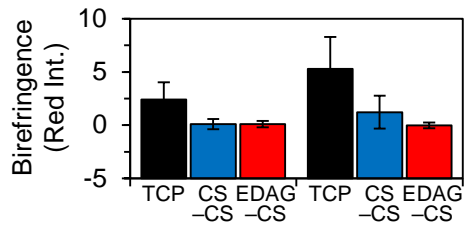

**Fig. S14** Quantification of red intensity of birefringence of sirius red F3B labeled human mesenchymal stem cells imaged with crossed polarizers.  $n = 3$ , ANOVA F-value 1.3 and  $p$ -value 0.34, and error bars are SEM.

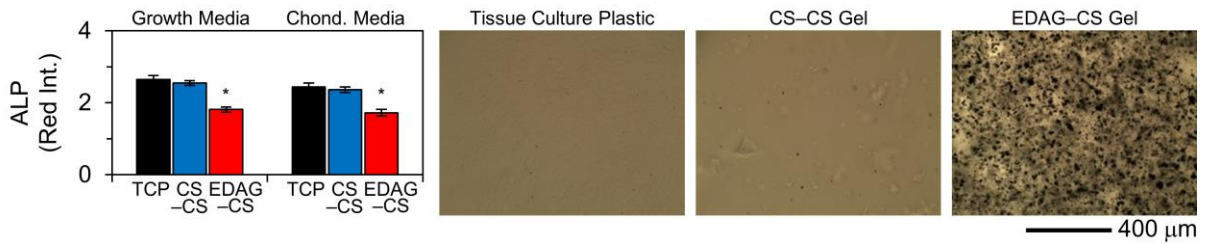

**Fig. S15** Human mesenchymal stem cells (hMSCs) were encapsulated in chondroitin sulfate (CS–CS) or ethylenediamine graphene (EDAG)–CS gels or grown on tissue culture plastic (TCP) as a control, and after 3 days in growth media, were cultured for an additional 2 weeks in either growth media or chondrogenic (Chond.) differentiation media. To determine if the hMSCs were undergoing endochondral ossification towards a bone phenotype, they were stained for alkaline phosphatase (ALP), a marker of osteoblasts. Here, ALP would stain red, and the lack of red intensity suggests that hMSCs were not undergoing endochondral ossification. The ALP intensity was slightly but significantly reduced for hMSCs encapsulated and cultured in EDAG–CS gels.  $n = 3$ . ANOVA F-value 20.2 and  $p$ -value  $1.8 \times 10^{-5}$ . Sidak post hoc test two-tailed  $p$ -values for EDAG–CS growth media to TCP growth media, CS–CS growth media, TCP chondrogenic media, and CS–CS chondrogenic media are  $3.0 \times 10^{-4}$ ,  $9.5 \times 10^{-4}$ ,  $4.2 \times 10^{-3}$ , and  $1.1 \times 10^{-2}$ , respectively; and for EDAG–CS chondrogenic media to TCP growth media, CS–CS growth media, TCP chondrogenic media, and CS–CS chondrogenic media are  $1.1 \times 10^{-4}$ ,  $3.2 \times 10^{-4}$ ,  $1.3 \times 10^{-3}$ , and  $3.2 \times 10^{-3}$ , respectively. Note that \* indicates a  $p$ -value  $< 0.05$  compared to TCP and CS–CS gels for both growth and chondrogenic medias.
